# Supplementary material for: Resistance Profiles and Virulence Determinants in Biofilm-Forming Enterococcus faecium Isolated from Raw Seafood in Bangladesh
Source: MDPI journal article supplement (doi:10.3390/pathogens12091101), 2023-08-28
Supplement: s1 [file s1]

**Table S1.** Antibiotic resistance, biofilm, and virulence profiles of *Enterococcus faecium* isolated from seafood in Bangladesh.

| SL No. | Sample Types | Sample ID | Biofilm Properties | Antibiogram Profiles                     |                          | Virulence Gene Patterns                            |
|--------|--------------|-----------|--------------------|------------------------------------------|--------------------------|----------------------------------------------------|
|        |              |           |                    | Phenotypic                               | Genotypic                |                                                    |
| 01     | Shrimp       | WSM1      | Strong             | P, AMP, VAN, E, TE, LZ, RD               | <i>bla<sub>TEM</sub></i> | <i>agg, fsrA, fsrB, fsrC, sprE, ace, pil</i>       |
| 02     |              | WSM7      | Intermediate       | P, VAN, E, TE, LZ, RD                    |                          | <i>agg, fsrA, fsrB, fsrC, gelE, ace, pil</i>       |
| 03     |              | WSC3      | Intermediate       | P, AMP, VAN, E, TE, RD                   | <i>bla<sub>TEM</sub></i> | <i>agg, sprE, ace, pil</i>                         |
| 04     |              | WSC10     | Strong             | P, AMP, VAN, E, TE, LZ, RD               | <i>bla<sub>TEM</sub></i> | <i>agg, fsrC, gelE, ace, pil</i>                   |
| 05     |              | WSK7      | Intermediate       | P, AMP, E, TE, LZ, RD                    | <i>bla<sub>TEM</sub></i> | <i>agg, fsrA, gelE, sprE, ace, pil</i>             |
| 06     |              | TSM5      | Strong             | P, AMP, VAN, E, TE, LZ, RD               | <i>bla<sub>TEM</sub></i> | <i>agg, fsrA, fsrB, fsrC, gelE, sprE, ace, pil</i> |
| 07     |              | TSC8      | Strong             | P, AMP, VAN, E, TE, LZ, RD               |                          | <i>fsrA, fsrB, fsrC, gelE, ace, pil</i>            |
| 08     | Crab         | CM5       | Non –former        | P, AMP, E, TE, LZ, RD                    | <i>bla<sub>TEM</sub></i> | <i>agg, gelE, sprE, ace, pil</i>                   |
| 09     |              | CM8       | Strong             | P, AMP, VAN, E, TE, LZ, FOS, RD          | <i>bla<sub>TEM</sub></i> | <i>agg, fsrA, fsrB, fsrC, gelE, sprE, ace, pil</i> |
| 10     |              | CM09      | Intermediate       | P, VAN, E, LZ, RD                        | <i>bla<sub>TEM</sub></i> | <i>gelE, ace, pil</i>                              |
| 11     |              | CC02      | Intermediate       | P, AMP, VAN, E, TE, RD                   | <i>bla<sub>TEM</sub></i> | <i>agg, fsrA, fsrB, fsrC, ace, pil</i>             |
| 12     |              | CC07      | Strong             | P, AMP, VAN, E, NX, LZ, RD               | <i>bla<sub>TEM</sub></i> | <i>agg, fsrA, fsrB, fsrC, gelE, sprE, ace, pil</i> |
| 13     |              | CC10      | Strong             | P, VAN, E, TE, LZ, FOS, RD               | <i>bla<sub>TEM</sub></i> | <i>agg, fsrA, fsrB, fsrC, gelE, ace, pil</i>       |
| 14     |              | CK01      | Intermediate       | P, AMP, VAN, E, TE, RD                   |                          | <i>sprE, ace, pil</i>                              |
| 15     | Marine Fish  | CK05      | Intermediate       | P, VAN, E, TE, FOS, RD                   |                          | <i>fsrA, fsrB, gelE, ace, pil</i>                  |
| 16     |              | RM02      | Strong             | P, AMP, VAN, E, TE, CIP, LZ, RD          | <i>bla<sub>TEM</sub></i> | <i>agg, fsrA, fsrB, fsrC, gelE, sprE, ace, pil</i> |
| 17     |              | RM07      | Non –former        | P, E, TE, LZ, RD                         |                          | <i>agg, fsrA, ace, pil</i>                         |
| 18     |              | RM10      | Intermediate       | P, VAN, E, TE, LZ, RD                    |                          | <i>fsrB, gelE, sprE, ace, pil</i>                  |
| 19     |              | RC01      | Non –former        | P, E, TE, RD                             |                          | <i>agg, gelE, ace, pil</i>                         |
| 20     |              | RC04      | Strong             | P, AMP, VAN, E, TE, LZ, RD               | <i>bla<sub>TEM</sub></i> | <i>agg, fsrA, fsrC, gelE, sprE, ace, pil</i>       |
| 21     |              | RK01      | Non –former        | P, E, RD                                 |                          | <i>Pil, fsrA, fsrB, fsrC</i>                       |
| 22     |              | RK02      | Intermediate       | P, VAN, E, TE, LZ, RD                    | <i>bla<sub>TEM</sub></i> | <i>agg, fsrA, fsrC, ace, pil</i>                   |
| 23     |              | TM01      | Strong             | P, AMP, VAN, E, TE, NX, LZ, RD           | <i>bla<sub>TEM</sub></i> | <i>agg, fsrA, fsrB, fsrC, sprE, ace, pil</i>       |
| 24     |              | TM02      | Strong             | P, AMP, VAN, E, TE, LZ, RD               | <i>bla<sub>TEM</sub></i> | <i>agg, fsrB, gelE, sprE, ace, pil</i>             |
| 25     |              | TM05      | Non –former        | P, E, RD                                 |                          | <i>ace, pil</i>                                    |
| 26     |              | TM08      | Intermediate       | P, AMP, VAN, E, LZ, RD                   | <i>bla<sub>TEM</sub></i> | <i>agg, fsrA, fsrB, gelE, sprE, ace, pil</i>       |
| 27     |              | TM10      | Intermediate       | P, AMP, VAN, E, TE, CIP, LZ, FOS, RD     | <i>bla<sub>TEM</sub></i> | <i>ace, pil</i>                                    |
| 28     |              | TC04      | Strong             | P, AMP, VAN, E, TE, CIP, NX, LZ, FOS, RD | <i>bla<sub>TEM</sub></i> | <i>agg, fsrA, fsrB, fsrC, sprE, ace, pil</i>       |
| 29     |              | TC07      | Non –former        | P, E, RD                                 |                          | <i>pil</i>                                         |

|    |      |              |                                     |                          |                                                    |
|----|------|--------------|-------------------------------------|--------------------------|----------------------------------------------------|
| 30 | TK02 | Strong       | P, AMP, VAN, E, TE, LZ, FOS, RD     | <i>bla<sub>TEM</sub></i> | <i>agg, fsrA, gelE, ace, pil</i>                   |
| 31 | TK03 | Intermediate | P, AMP, VAN, TE, RD                 |                          | <i>agg, fsrA, fsrB, fsrC, gelE, sprE, ace, pil</i> |
| 32 | TK05 | Non –former  | P, E, RD                            |                          | <i>gelE, sprE, ace, pil</i>                        |
| 33 | LM03 | Strong       | P, AMP, VAN, E, TE, CIP, NX, LZ, RD | <i>bla<sub>TEM</sub></i> | <i>agg, fsrA, fsrB, fsrC, gelE, ace, pil</i>       |
| 34 | LM09 | Strong       | P, AMP, VAN, E, TE, LZ, RD          |                          | <i>agg, fsrA, gelE, sprE, ace, pil</i>             |
| 35 | LM10 | Non –former  | P, E, LZ, RD                        | <i>bla<sub>TEM</sub></i> | <i>fsrA, ace, pil</i>                              |
| 36 | LC01 | Intermediate | P, AMP, VAN, E, RD                  | <i>bla<sub>TEM</sub></i> | <i>agg, gelE, sprE, ace, pil</i>                   |
| 37 | LC03 | Strong       | P, AMP, VAN, E, TE, NX, LZ, FOS, RD |                          | <i>agg, fsrA, fsrB, gelE, sprE, ace, pil</i>       |
| 38 | LC08 | Intermediate | P, AMP, E, LZ, RD                   | <i>bla<sub>TEM</sub></i> | <i>fsrB, pil</i>                                   |
| 39 | LK01 | Non –former  | P, TE, LZ, RD                       |                          | <i>agg, fsrA, ace, pil</i>                         |
| 40 | LK02 | Strong       | P, AMP, VAN, E, TE, LZ, RD          | <i>bla<sub>TEM</sub></i> | <i>fsrA, fsrB, gelE, sprE, ace, pil</i>            |
| 41 | LK04 | Strong       | P, AMP, VAN, E, TE, LZ, RD          |                          | <i>agg, fsrA, fsrC, gelE, sprE, ace, pil</i>       |

Here, CIP = Ciprofloxacin, TE = Tetracycline, LEV = Levofloxacin, FOS = Fosfomycin, RD = Rifampin, P = Penicillin, LZD = Linezolid, NOR = Norfloxacin, NIT = Nitrofurantoin, AMP = Ampicillin, C = Chloramphenicol, VA = Vancomycin, E = Erythromycin.

**Table S2:** Pearson correlation coefficient to assess the pairs of any of two virulence genes detected in *E. faecium* isolated from seafood in Bangladesh.

|             |                     | <i>agg</i>    | <i>fsrA</i>   | <i>fsrB</i>   | <i>fsrC</i> | <i>gelE</i>  | <i>sprE</i> | <i>ace</i> | <i>pil</i> | <i>cyl</i> |
|-------------|---------------------|---------------|---------------|---------------|-------------|--------------|-------------|------------|------------|------------|
| <i>agg</i>  | Pearson Correlation | 1             |               |               |             |              |             |            |            |            |
|             | Sig. (2-tailed)     |               |               |               |             |              |             |            |            |            |
| <i>fsrA</i> | Pearson Correlation | <b>.394*</b>  | 1             |               |             |              |             |            |            |            |
|             | Sig. (2-tailed)     | 0.011         |               |               |             |              |             |            |            |            |
| <i>fsrB</i> | Pearson Correlation | 0.069         | <b>.429**</b> | 1             |             |              |             |            |            |            |
|             | Sig. (2-tailed)     | 0.668         | 0.005         |               |             |              |             |            |            |            |
| <i>fsrC</i> | Pearson Correlation | <b>.392*</b>  | <b>.533**</b> | <b>.470**</b> | 1           |              |             |            |            |            |
|             | Sig. (2-tailed)     | 0.011         | 0             | 0.002         |             |              |             |            |            |            |
| <i>gelE</i> | Pearson Correlation | 0.244         | 0.094         | 0.17          | 0.06        | 1            |             |            |            |            |
|             | Sig. (2-tailed)     | 0.124         | 0.56          | 0.287         | 0.711       |              |             |            |            |            |
| <i>sprE</i> | Pearson Correlation | <b>.313*</b>  | 0.053         | 0.169         | 0.034       | <b>.310*</b> | 1           |            |            |            |
|             | Sig. (2-tailed)     | 0.046         | 0.743         | 0.29          | 0.835       | 0.049        |             |            |            |            |
| <i>ace</i>  | Pearson Correlation | <b>.412**</b> | 0.193         | -0.087        | 0.06        | <b>.370*</b> | 0.302       | 1          |            |            |
|             | Sig. (2-tailed)     | 0.007         | 0.227         | 0.589         | 0.71        | 0.017        | 0.055       |            |            |            |
| <i>pil</i>  | Pearson Correlation | .c            | .c            | .c            | .c          | .c           | .c          | .c         | .c         |            |
|             | Sig. (2-tailed)     | .             | .             | .             | .           | .            | .           | .          | .          | .          |
| <i>cyl</i>  | Pearson Correlation | .c            | .c            | .c            | .c          | .c           | .c          | .c         | .c         | .c         |
|             | Sig. (2-tailed)     | .             | .             | .             | .           | .            | .           | .          | .          | .          |

\*Correlation is significant at the 0.05 level (2-tailed); \*\*Correlation is significant at the 0.01 level (2-tailed); .cCannot be computed because at least one of the variables is constant.

**Table S3.** Pearson correlation coefficients between any of two antibiotics to which *E. faecium* isolates showed resistance.

|     |                     | P  | AMP           | VAN           | E      | TE            | CIP   | LEV | NX    | NIT | C  | LZ    | FOS | RD |
|-----|---------------------|----|---------------|---------------|--------|---------------|-------|-----|-------|-----|----|-------|-----|----|
| P   | Pearson Correlation | .a |               |               |        |               |       |     |       |     |    |       |     |    |
|     | Sig. (2-tailed)     | .  |               |               |        |               |       |     |       |     |    |       |     |    |
| AMP | Pearson Correlation | .a | 1             |               |        |               |       |     |       |     |    |       |     |    |
|     | Sig. (2-tailed)     | .  |               |               |        |               |       |     |       |     |    |       |     |    |
| VAN | Pearson Correlation | .a | <b>.454**</b> | 1             |        |               |       |     |       |     |    |       |     |    |
|     | Sig. (2-tailed)     | .  | 0.003         |               |        |               |       |     |       |     |    |       |     |    |
| E   | Pearson Correlation | .a | 0.298         | 0.118         | 1      |               |       |     |       |     |    |       |     |    |
|     | Sig. (2-tailed)     | .  | 0.058         | 0.461         |        |               |       |     |       |     |    |       |     |    |
| TE  | Pearson Correlation | .a | <b>.462**</b> | <b>.415**</b> | -0.154 | 1             |       |     |       |     |    |       |     |    |
|     | Sig. (2-tailed)     | .  | 0.002         | 0.007         | 0.335  |               |       |     |       |     |    |       |     |    |
| CIP | Pearson Correlation | .a | 0.213         | 0.17          | 0.064  | 0.191         | 1     |     |       |     |    |       |     |    |
|     | Sig. (2-tailed)     | .  | 0.18          | 0.288         | 0.693  | 0.23          |       |     |       |     |    |       |     |    |
| LEV | Pearson Correlation | .a | .a            | .a            | .a     | .a            | .a    | .a  |       |     |    |       |     |    |
|     | Sig. (2-tailed)     | .  | .             | .             | .      | .             | .     | .   | .     |     |    |       |     |    |
| NX  | Pearson Correlation | .a | 0.25          | 0.199         | 0.074  | 0.047         | 0.223 | .a  | 1     |     |    |       |     |    |
|     | Sig. (2-tailed)     | .  | 0.115         | 0.212         | 0.644  | 0.769         | 0.161 | .   | .     | .   |    |       |     |    |
| NIT | Pearson Correlation | .a | .a            | .a            | .a     | .a            | .a    | .a  | .a    | .a  |    |       |     |    |
|     | Sig. (2-tailed)     | .  | .             | .             | .      | .             | .     | .   | .     | .   | .  |       |     |    |
| C   | Pearson Correlation | .a | .a            | .a            | .a     | .a            | .a    | .a  | .a    | .a  | .a |       |     |    |
|     | Sig. (2-tailed)     | .  | .             | .             | .      | .             | .     | .   | .     | .   | .  | .     |     |    |
| LZ  | Pearson Correlation | .a | 0.29          | 0.215         | 0.103  | <b>.483**</b> | 0.181 | .a  | 0.212 | .a  | .a | 1     |     |    |
|     | Sig. (2-tailed)     | .  | 0.065         | 0.176         | 0.521  | 0.001         | 0.258 | .   | 0.184 | .   | .  | .     | .   |    |
| FOS | Pearson Correlation | .a | 0.118         | 0.298         | 0.111  | 0.071         | 0.098 | .a  | 0.046 | .a  | .a | 0.046 | 1   |    |
|     | Sig. (2-tailed)     | .  | 0.461         | 0.058         | 0.488  | 0.659         | 0.542 | .   | 0.777 | .   | .  | 0.774 | .   | .  |
| RD  | Pearson Correlation | .a | .a            | .a            | .a     | .a            | .a    | .a  | .a    | .a  | .a | .a    | .a  | .a |
|     | Sig. (2-tailed)     | .  | .             | .             | .      | .             | .     | .   | .     | .   | .  | .     | .   | .  |

\*\* Correlation is significant at the 0.01 level (2-tailed), .aCannot be computed because at least one of the variables is constant, CIP = Ciprofloxacin, TE = Tetracycline, LEV = Levofloxacin, FOS = Fosfomycin, RD = Rifampin, P = Penicillin, LZD = Linezolid, NOR = Norfloxacin, NIT = Nitrofurantoin, AMP = Ampicillin, C = Chloramphenicol, VA = Vancomycin, E = Erythromycin.
